# Supplementary material
Source: PubMed Central journal article supplement (PMC4065808)
Supplement: NIHMS592320-supplement-1.pdf [file NIHMS592320-supplement-1.pdf]

## Supplemental Data

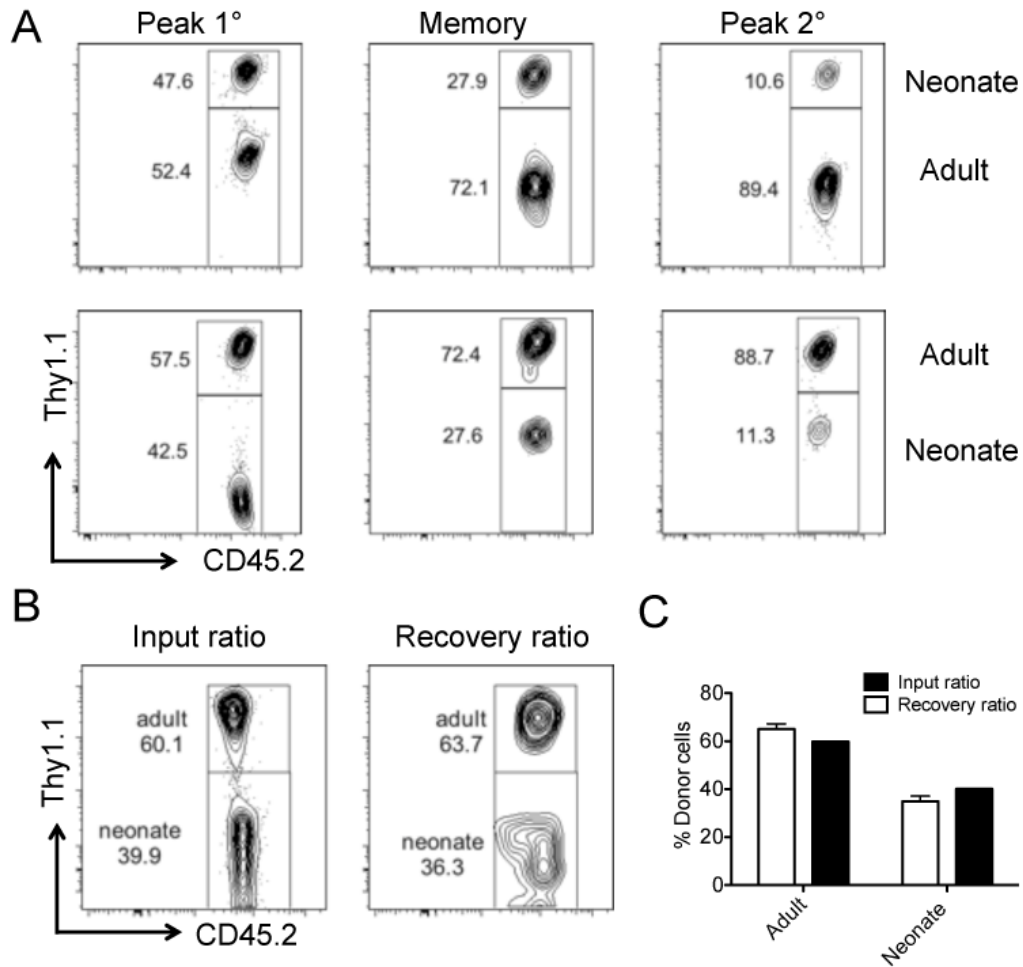

**Figure S1. Impaired development of neonatal memory CD8<sup>+</sup> T cells is not due to the expression of specific congenic markers or different levels of engraftment by neonatal and adult donor cells.** (A) To confirm that expression of specific congenic markers does not alter our findings, we performed the co-transfer experiment with switched congenic markers. Displayed are the percentages of both donor populations at primary, memory and secondary phases of the response. In the top panel, neonatal gBT-I cells have the Thy1.1 marker (primary: day 6, memory: day 30, secondary: day 30+6). In the bottom panel adult gBT-I cells have the Thy1.1 marker (primary: day 7, memory: day 80, secondary: day 80+7). (B) The seeding efficiency of neonatal and adult donors was also compared by colonizing recipients with  $1 \times 10^5$  donor cells ( $5 \times 10^4$  each donor). Representative plots showing ratio of adult (Thy1.1<sup>+</sup>) to neonatal (Thy1.1<sup>-</sup>) donors prior to transfer (left) and recovered after 18 hours (right). (C) Bar graph showing distribution of individuals (n=4).

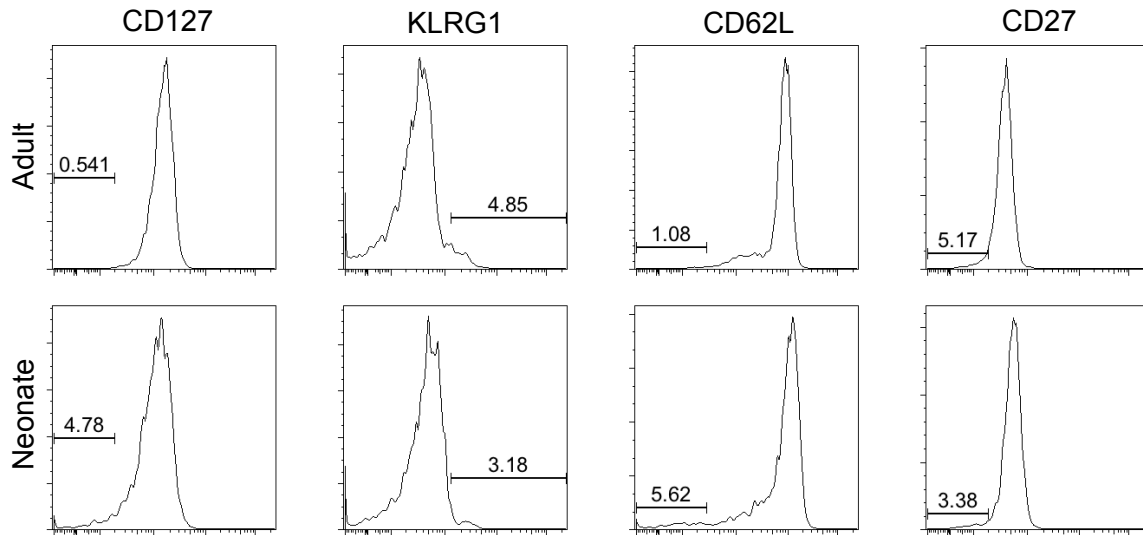

**Figure S2. Adult and neonatal donors have similar naïve phenotype prior to injection.** A sample of donor cells was assessed for starting phenotype. The majority of both donor populations show a similar phenotype:  $CD127^{hi}KLRG1^{low}CD62L^{hi}CD27^{hi}$ .

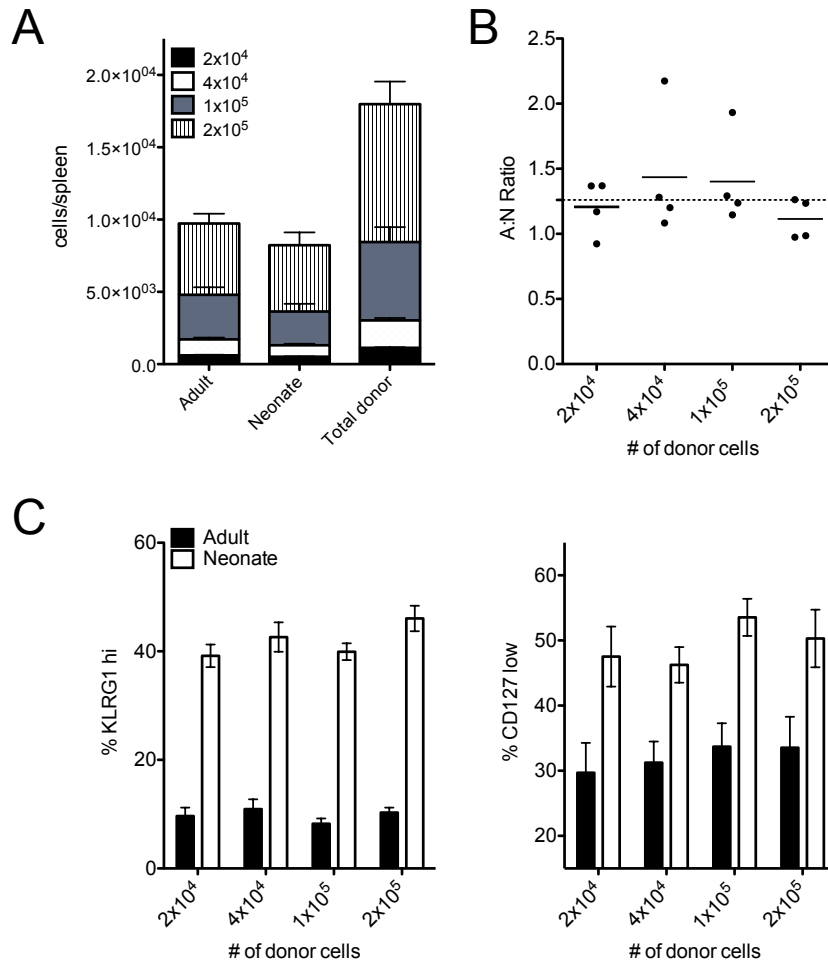

**Figure S3. Higher numbers of donor cells can be transferred into recipients without altering phenotype during early infection.** (A) The co-transfer was set up with standard number of donor cells ( $2 \times 10^4$ ) or two, five or ten times that amount. At all starting cell numbers,  $\sim 10\%$  of transferred cells are recovered four days after donor cell transfer and WT LmgB infection. (B) Ratio of adult to neonatal donors is similar for all input donor values tested. (C) Percentage of each donor population that are KLRG1<sup>hi</sup> or CD127<sup>low</sup>. These data show that phenotypic profiles are unchanged with ten times more gBT-I cells.

**A**

| Gene name | Adult FPKM | Neonate FPKM | q value |
|-----------|------------|--------------|---------|
| wls       | 12.16      | 0.57         | 0.0019  |
| serpina3g | 13.48      | 0.75         | 0.0019  |
| als2cl    | 2.54       | 0.22         | 0.013   |
| h2-ob     | 3.38       | 0.32         | 0.021   |
| h2-dma    | 18.79      | 2.41         | 0.0019  |
| pecam1    | 9.42       | 1.34         | 0.0019  |
| st6gal1   | 1.57       | 0.23         | 0.020   |
| mlkl      | 3.13       | 0.46         | 0.048   |
| casp4     | 21.22      | 3.49         | 0.0019  |
| lancl3    | 4.77       | 0.87         | 0.0019  |
| fgf13     | 27.59      | 5.10         | 0.0019  |
| oas1a     | 3.74       | 0.71         | 0.0088  |
| ctla4     | 10.32      | 2.00         | 0.0019  |
| tnfsf8    | 3.81       | 0.74         | 0.0019  |
| btla      | 8.64       | 1.70         | 0.0019  |
| ccr7      | 6.09       | 1.20         | 0.0019  |
| pacsin1   | 3.38       | 0.73         | 0.0063  |
| tlr1      | 10.18      | 2.29         | 0.0019  |
| sell      | 21.42      | 4.87         | 0.0019  |
| cacnb1    | 3.38       | 0.83         | 0.027   |
| snrpn     | 0.37       | 12.96        | 0.024   |
| dsg2      | 0.36       | 7.48         | 0.0019  |
| lrig3     | 0.21       | 3.79         | 0.042   |
| tshz3     | 0.42       | 6.65         | 0.0019  |
| cd163l1   | 15.43      | 231.36       | 0.0019  |
| clip4     | 0.43       | 4.66         | 0.0019  |
| naip6     | 0.18       | 1.86         | 0.049   |
| fxyd7     | 1.92       | 15.07        | 0.0088  |
| klrb1c    | 6.41       | 49.73        | 0.0019  |
| bmpr1a    | 0.55       | 4.16         | 0.0019  |
| fcrlg     | 2.46       | 17.67        | 0.0019  |
| podxl     | 0.42       | 2.73         | 0.0019  |
| srgap3    | 1.04       | 6.37         | 0.0019  |
| rnf43     | 2.48       | 15.05        | 0.0019  |
| knj8      | 8.07       | 46.69        | 0.0019  |
| yes1      | 0.58       | 3.26         | 0.0019  |
| styk1     | 0.37       | 2.09         | 0.0088  |
| syk       | 0.37       | 2.03         | 0.0036  |
| lhfp12    | 0.41       | 2.25         | 0.0019  |
| stac2     | 0.33       | 1.53         | 0.044   |

**B**

| Gene name | Adult FPKM | Neonate FPKM | q value |
|-----------|------------|--------------|---------|
| blimp1    | 11.60      | 17.59        | 0.0050  |
| t-bet     | 162.81     | 218.04       | 0.062   |
| id2       | 506.00     | 529.31       | 0.94    |
| eomes     | 22.80      | 17.78        | 0.30    |
| bcl6      | 3.29       | 2.48         | 0.50    |
| id3       | 7.12       | 3.25         | 0.060   |

**C**

| Gene name | Adult FPKM | Neonate FPKM | q value     | Fas/<br>Intrinsic |
|-----------|------------|--------------|-------------|-------------------|
| flip      | 17.55      | 16.45        | 0.92        | Fas               |
| fasl      | 20.09      | 38.20        | 0.0019      | Fas               |
| caspase 7 | 20.27      | 28.97        | 0.031       | Fas               |
| caspase 6 | 16.23      | 18.94        | 0.75        | Fas               |
| caspase 3 | 30.94      | 32.55        | 0.95        | Fas               |
| fas       | 19.75      | 18.48        | 0.94        | Fas               |
| caspase 8 | 57.68      | 50.27        | 0.70        | Fas               |
| fadd      | 4.68       | 3.48         | 0.41        | Fas               |
| bcl-xl    | 15.68      | 16.69        | 0.94        | Intrinsic         |
| mcl-1     | 128.69     | 118.92       | 0.88        | Intrinsic         |
| a1        | 18.30      | 16.59        | 0.92        | Intrinsic         |
| bcl-2     | 6.89       | 4.58         | 0.019       | Intrinsic         |
| bcl-w     | 2.58       | 1.10         | 0.0063      | Intrinsic         |
| bad       | 11.95      | 13.35        | 0.92        | Intrinsic         |
| apaf-1    | 23.10      | 22.77        | 0.99        | Intrinsic         |
| bax       | 128.95     | 124.81       | 0.97        | Intrinsic         |
| bak       | 52.24      | 49.34        | 0.93        | Intrinsic         |
| bnip3     | 1.26       | 1.18         | 1 (no test) | Intrinsic         |
| bid       | 19.90      | 18.48        | 0.92        | Intrinsic         |
| cyt c     | 10.12      | 9.21         | 0.89        | Intrinsic         |
| bmf       | 3.02       | 2.65         | 0.85        | Intrinsic         |
| bik       | 1.56       | 1.24         | 1 (no test) | Intrinsic         |
| bim       | 10.14      | 6.81         | 0.32        | Intrinsic         |

**Table S1. Expression levels for RNAseq genes.**

Expression values, as FPKM, are shown for (A) the most differentially expressed genes, (B) transcription factors involved in effector or memory cell differentiation, and (C) genes used in the Fas or intrinsic apoptosis pathway. q values indicate multiple-test corrected significance level.
